# Supplementary material for: A novel lncRNA-mediated signaling axis governs cancer stemness and splicing reprogramming in hepatocellular carcinoma with therapeutic potential
Source: J Exp Clin Cancer Res. 2025 Oct 9;44:287. doi: 10.1186/s13046-025-03546-w (PMC12512555; doi:10.1186/s13046-025-03546-w)
Supplement: Supplementary file 2 — Supplementary Material 2 [file 13046_2025_3546_MOESM2_ESM.xlsx]

## Sheet: Sheet1
Table S1. PCR primer sequences used in this study.
Primer name	Primer sequence (5'to3')
(1) qPCR
RAB30-DT-F	AAGGCGTCCGAAGAAATCGT
RAB30-DT-R	ATCTGCTTTCGCTGGTTGGT
SRPK1-F	GGGCATCATCTGCTCAAGTGGA
SRPK1-R	GTCAGTGTGGATGATACGGCAC
CD44-F	CCAGAAGGAACAGTGGTTTGGC
CD44-R	ACTGTCCTCTGGGCTTGGTGTT
CD133-F	CACTACCAAGGACAAGGCGTTC
CD133-R	CAACGCCTCTTTGGTCTCCTTG
SOX2-F	GCTACAGCATGATGCAGGACCA
SOX2-R	TCTGCGAGCTGGTCATGGAGTT
CDCA7-V2-F	CCATGGAAACCTCGTCATCCT
CDCA7-V2-R	TGACTGCAGCCTCGTGTTT
CDCA7-V1-F	TCCATGGAAACCTCGTCATCC
CDCA7-V1-R	ACTTTCTGAAAAGCCGCAGA
CDCA7-F	AGAGGAAGACCGTGGATGGCTA
CDCA7-R	TGCAGACGTTCTCCAACTCCTC
CREB1-F	GACCACTGATGGACAGCAGATC
CREB1-R	GAGGATGCCATAACAACTCCAGG
CCND1-F	TCTACACCGACAACTCCATCCG
CCND1-R	TCTGGCATTTTGGAGAGGAAGTG
c-jun-F	CCTTGAAAGCTCAGAACTCGGAG
c-jun-R	TGCTGCGTTAGCATGAGTTGGC
TCF-1-F	AGACGCTAGTGGAGGAGTGCAA
TCF-1-R	GGCAAACCAGTTGTAGACACGC
c-myc-F	CCTGGTGCTCCATGAGGAGAC
c-myc-R	CAGACTCTGACCTTTTGCCAGG
ALDH1A1-F	CGGGAAAAGCAATCTGAAGAGGG
ALDH1A1-R	GATGCGGCTATACAACACTGGC
ALDH2-F	TTGCCTCCCATGAGGATGTGGA
ALDH2-R	GGTCACTCTCTTGAGGTTGCTG
GAPDH-F	GTCTCCTCTGACTTCAACAGCG
GAPDH-R	ACCACCCTGTTGCTGTAGCCAA
(2) ChIP qPCR
Control-F	TGCACCAGAAGAAATAACCCGA
Control-R	TGGATGTATGGGACTCTGCAC
RAB30-DT-F	GGAGAGACCGTAGCACAATGA
RAB30-DT-R	GCATGGCTATTGGGGACGTT
(3) PCR Amplification
RAB30-DT-full-length-F	ATGATTAACAAAGGCGTCCGAA
RAB30-DT-full-length-R	CTATTCCCTCTCTCTTCTTACT
(4) PCR for RNA pull down
Sense-RAB30-DT-F	TAATACGACTCACTATAGGGAGAGTGAAGGAGCAAAGGGGAC
Sense-RAB30-DT-R	GGCGCTTTGTCAGCGCCGCCTTTTTCATTGTTGTATTCATGG
Antisense-RAB30-DT-F	GGCGCTTTGTCAGCGCCAGAGTGAAGGAGCAAAGGGGAC
Antisense-RAB30-DT-R	TAATACGACTCACTATAGGGGCCTTTTTCATTGTTGTATTCATGG
