# Supplementary material for: A novel lncRNA-mediated signaling axis governs cancer stemness and splicing reprogramming in hepatocellular carcinoma with therapeutic potential
Source: J Exp Clin Cancer Res. 2025 Oct 9;44:287. doi: 10.1186/s13046-025-03546-w (PMC12512555; doi:10.1186/s13046-025-03546-w)
Supplement: Supplementary file 4 — Supplementary Material 4 [file 13046_2025_3546_MOESM4_ESM.xlsx]

## Sheet: intersect RAB30-DT&mRNAsi&SRPK1
Table S3. Identification of potential therapeutic compounds based on RAB30-DT, SRPK1 and CREB1 expression and mRNAsi scores in HCC.
	logFC	AveExpr	t	P.Value	adj.P.Val	B	change	symbol
dasatinib	0.351200137566061	10.086669647216	6.24875840798822	1.32557520403393e-09	2.3789790733993e-09	10.8980870784273	up	dasatinib
selumetinib:PLX-4032 (8:1 mol/mol)	0.267210607260219	12.0256201517476	5.49529083589142	7.99984751751758e-08	1.25446113895957e-07	6.90758717633903	up	selumetinib:PLX-4032 (8:1 mol/mol)
selumetinib:BRD-A02303741 (4:1 mol/mol)	0.24657144685334	12.0064073445941	5.59960574013689	4.6443111509244e-08	7.43089784147904e-08	7.43525813709582	up	selumetinib:BRD-A02303741 (4:1 mol/mol)
PD318088	0.16975598396768	12.2300105168771	3.5641946606788	0.000420869250484608	0.000521391827372007	-1.29004	up	PD318088
selumetinib:MK-2206 (8:1 mol/mol)	0.169545768284779	10.5723239956701	4.17780533005689	3.8054840497342e-05	5.03134025623122e-05	0.978161738855921	up	selumetinib:MK-2206 (8:1 mol/mol)
erlotinib:PLX-4032 (2:1 mol/mol)	0.160327900043015	13.2862738695047	5.44789500874995	1.02153245505569e-07	1.58086334028291e-07	6.67054602414461	up	erlotinib:PLX-4032 (2:1 mol/mol)
selumetinib	0.119657299444514	11.9168847519022	2.69412402557745	0.00743151995603514	0.00831203179916726	-3.93037	up	selumetinib
BRD-K79669418	0.112952457335026	14.7378774532391	5.2412842111528	2.9089726722205e-07	4.44347929219443e-07	5.65722509011361	up	BRD-K79669418
BRD-K99584050	0.103490762219438	14.5972059728995	7.17220895926233	5.19585954409314e-12	1.10970393882894e-11	16.3237023949603	up	BRD-K99584050
vandetanib	0.101481299756792	12.6358434825135	5.21697093887805	3.28339245338603e-07	4.96718345512245e-07	5.54014060215872	up	vandetanib
gefitinib	0.0929655956659746	12.5091879504763	3.65054027501282	0.00030576300312962	0.000379789835466264	-0.990748	up	gefitinib
pyrazolanthrone	0.0513528133327639	13.9385884792218	6.39254865408143	5.79904436958731e-10	1.08187705234989e-09	11.7055319146846	up	pyrazolanthrone
PLX-4032	0.0470456556986746	14.6716536493633	2.9551589727753	0.00335814262578335	0.00385655308849086	-3.21097	up	PLX-4032
AGK-2	-0.0107635	14.7676572024417	-4.06328	6.09981666859239e-05	7.93144205943694e-05	0.53011572690979	down	AGK-2
EX-527	-0.0254041	15.141708488235	-11.0982	2.05387055545322e-24	1.31003635428908e-23	44.5304343190225	down	EX-527
lomeguatrib	-0.0306986	14.2680378018933	-8.75995	1.17841709872357e-16	3.91699204646143e-16	26.8532550481587	down	lomeguatrib
BRD-K03911514	-0.031158	15.008263214676	-11.3526	2.61254351310954e-25	1.78713121476478e-24	46.5747011593491	down	BRD-K03911514
VU0155056	-0.0430171	14.5719281152612	-10.8614	1.37437874209847e-23	7.980265876945e-23	42.6464625959701	down	VU0155056
phloretin	-0.0476379	13.6622933676276	-4.44179	1.23226787510435e-05	1.676168406482e-05	2.0532220262783	down	phloretin
PRL-3 inhibitor I	-0.0501446	14.8824262329675	-5.08405	6.31557596785625e-07	9.37406244285582e-07	4.9081702973762	down	PRL-3 inhibitor I
GW-405833	-0.0564335	13.360618432954	-5.58493	5.01595287022945e-08	7.99841133360913e-08	7.36052494943978	down	GW-405833
BRD6340	-0.0572819	14.3548176633048	-7.6712	2.09269711751944e-13	5.01397481964049e-13	19.479793577901	down	BRD6340
BRD-K17060750	-0.0577557	15.1313627234515	-7.56126	4.29975600544673e-13	9.99746223926531e-13	18.7716400575166	down	BRD-K17060750
bortezomib	-0.0581359	11.7271872498147	-3.1988	0.00151885371355142	0.00181035089089967	-2.48286	down	bortezomib
MI-1	-0.0641953	14.9789532494164	-8.05767	1.57847461892298e-14	4.38258835371556e-14	22.0238863052397	down	MI-1
cyanoquinoline 11	-0.064346	13.4358550793463	-5.06612	6.891230921641e-07	1.01964294514563e-06	4.82397574234031	down	cyanoquinoline 11
ML050	-0.066063	14.5379225944051	-6.64493	1.31476149503416e-10	2.58569760690052e-10	13.1568381365413	down	ML050
KHS101	-0.0672349	12.3274561548425	-4.80135	2.42859581952226e-06	3.50549610646638e-06	3.61046852815133	down	KHS101
MST-312	-0.0682523	12.179815273384	-4.30721	2.20484816969841e-05	2.93151643971169e-05	1.49781548743758	down	MST-312
BMS-195614	-0.0686275	14.6375496420135	-8.78368	9.94420213946419e-17	3.35261672130507e-16	27.0208342450683	down	BMS-195614
BRD-K19103580	-0.0736135	14.510080981695	-12.4115	4.03747641158417e-29	4.05465716227176e-28	55.2801672638525	down	BRD-K19103580
StemRegenin 1	-0.0750417	13.4976176410739	-6.1532	2.27873427014968e-09	4.01329319220392e-09	10.3694071758018	down	StemRegenin 1
PF-573228	-0.0779269	12.8399018681062	-5.73657	2.24746419317054e-08	3.69617804591113e-08	8.14042304751203	down	PF-573228
linsitinib	-0.0796653	14.231281070475	-3.10914	0.00204570878801068	0.0024139363698526	-2.7571	down	linsitinib
ML029	-0.0818	14.3326493720023	-9.29288	2.44413812272671e-18	9.1558189994207e-18	30.6813583716983	down	ML029
FQI-1	-0.0833553	12.4700058916688	-2.72493	0.00678687714799043	0.00762715717583686	-3.84876	down	FQI-1
valdecoxib	-0.0833892	13.0977183786718	-5.64965	3.56793834963695e-08	5.76735240078302e-08	7.69129726425945	down	valdecoxib
BIBR-1532	-0.0859898	13.8972341152998	-9.3696	1.38435549502542e-18	5.40013052604957e-18	31.2432339153137	down	BIBR-1532
BRD-K78574327	-0.0877977	15.1023566221972	-10.6075	1.03454302652638e-22	5.30765552739619e-22	40.6464903676108	down	BRD-K78574327
BRD-K13999467	-0.088171	14.5083349584777	-7.9917	2.46794571333458e-14	6.73335477857758e-14	21.5837083333562	down	BRD-K13999467
ML239	-0.0885825	14.2783426572353	-4.64693	4.93908969700195e-06	6.9176567863054e-06	2.92870127603716	down	ML239
BRD-K49290616	-0.0887339	14.6691505425948	-5.66427	3.30226571269766e-08	5.37472212549413e-08	7.76646444681441	down	BRD-K49290616
NSC19630	-0.0887544	14.1629949406491	-4.03684	6.79173199473569e-05	8.78273288086368e-05	0.428246023472737	down	NSC19630
BRD-K41597374	-0.0905436	14.2777148258975	-7.63524	2.65050291384219e-13	6.25518687666756e-13	19.2473851229112	down	BRD-K41597374
gossypol	-0.0973031	13.0430277726192	-6.39684	5.65665620854712e-10	1.06372180495388e-09	11.7298242347455	down	gossypol
KU-60019	-0.098764	13.5790113986381	-7.01395	1.3953286500565e-11	2.91413771162243e-11	15.3545138286524	down	KU-60019
BRD-K66453893	-0.108718	12.7000475832421	-5.04273	7.71899467205972e-07	1.13855171412881e-06	4.71451874853211	down	BRD-K66453893
BI-2536	-0.110415	7.18731152525871	-2.09328	0.0371144854932536	0.0394550386324678	-5.34308	down	BI-2536
BRD-K51490254	-0.111422	14.7987577563296	-9.0145	1.88111595612631e-17	6.8828428782296e-17	28.665	down	BRD-K51490254
AT-406	-0.112111	14.2485161069444	-6.39108	5.84846091766555e-10	1.08680061147171e-09	11.6972405098294	down	AT-406
marinopyrrole A	-0.113746	11.3606462642939	-4.65394	4.78427087983669e-06	6.74082344860572e-06	2.95925224829419	down	marinopyrrole A
BRD1835	-0.11871	14.4762112624278	-11.1538	1.31051962451541e-24	8.47349675029144e-24	44.9758241183617	down	BRD1835
nakiterpiosin	-0.121448	11.081601041832	-3.32595	0.000984145536296559	0.00118499156411218	-2.0814	down	nakiterpiosin
C6-ceramide	-0.12705	14.6462551870318	-14.8925	1.95880176411329e-38	9.24554432661471e-37	76.5825847858677	down	C6-ceramide
COL-3	-0.129421	12.7433093224253	-5.57024	5.41690522425241e-08	8.57979619411791e-08	7.28587932107501	down	COL-3
BRD-K85133207	-0.131995	14.4622297154048	-11.6953	1.576138380554e-26	1.18085288193887e-25	49.3594122642091	down	BRD-K85133207
manumycin A	-0.132105	13.656952832067	-4.49211	9.87732087636765e-06	1.35526030629231e-05	2.26475070663431	down	manumycin A
isoevodiamine	-0.132312	12.4842755599062	-6.02637	4.63234498286047e-09	7.97980595587644e-09	9.67768829614214	down	isoevodiamine
SU11274	-0.13658	13.8073781104425	-7.2168	3.9228502448688e-12	8.5326512238621e-12	16.5995721646718	down	SU11274
NSC48300	-0.144192	14.0238231194735	-7.81674	7.98348815699708e-14	2.04793826636012e-13	20.4279382948096	down	NSC48300
YK 4-279	-0.144258	12.7080988198557	-6.92366	2.43474047027596e-11	4.97488096091019e-11	14.8086672258686	down	YK 4-279
ML031	-0.144612	13.804688576166	-10.6423	7.85269311608237e-23	4.07304522064931e-22	40.9196015305633	down	ML031
piperlongumine:MST-312 (1:1 mol/mol)	-0.153061	12.6704182434345	-7.08801	8.80481290555435e-12	1.84705408507629e-11	15.8061365396657	down	piperlongumine:MST-312 (1:1 mol/mol)
STF-31	-0.154832	11.417108006443	-2.89763	0.00402050104669965	0.00459485833908532	-3.37493	down	STF-31
tosedostat	-0.155283	11.9331440342966	-8.41558	1.3421369135023e-15	4.03495938326806e-15	24.4531369430781	down	tosedostat
LY-2183240	-0.158281	12.6645456709999	-7.51641	5.75620311336761e-13	1.33182738701447e-12	18.4848522193511	down	LY-2183240
GMX-1778	-0.16951	12.8331418753266	-4.65532	4.75454460900266e-06	6.71899717200376e-06	2.96523165262565	down	GMX-1778
BRD-K70511574	-0.173295	11.1581017747105	-5.58188	5.09672192436277e-08	8.0998409033644e-08	7.34501843947415	down	BRD-K70511574
ISOX	-0.192984	11.9005629572846	-7.99057	2.48691172744947e-14	6.74610537561006e-14	21.5761692548938	down	ISOX
pifithrin-mu	-0.200892	14.5849165648064	-12.4237	3.6433548217168e-29	3.7383988605442e-28	55.3821155334925	down	pifithrin-mu
ceranib-2	-0.210008	11.290004924003	-6.59506	1.76862894741153e-10	3.43536157686519e-10	12.8666462088184	down	ceranib-2
LBH-589	-0.215345	5.15091998013389	-5.14607	4.66208977240296e-07	6.96362776131076e-07	5.20130809596958	down	LBH-589
BRD-K35604418	-0.21915	12.4906964973547	-10.6482	7.4966859113001e-23	3.93159527792627e-22	40.9655646190895	down	BRD-K35604418
MK-1775	-0.226014	10.9125702664431	-8.20363	5.82352934070754e-15	1.70727071354904e-14	23.0063158195608	down	MK-1775
belinostat	-0.226346	9.63811263197775	-4.13822	4.48496090616814e-05	5.91313281483621e-05	0.822021810998018	down	belinostat
entinostat	-0.226418	11.3726285275304	-6.61269	1.59286925734043e-10	3.10675326225075e-10	12.9690599869439	down	entinostat
SCH-79797	-0.234022	10.0859099441264	-10.4532	3.48990967643671e-22	1.73393407081908e-21	39.4421029446519	down	SCH-79797
BRD-K45681478	-0.249369	13.317690655457	-9.49003	5.64259677781406e-19	2.23807199926742e-18	32.1305018806973	down	BRD-K45681478
ML311	-0.302456	12.2117005161915	-10.7343	3.78572461427499e-23	2.03052502038386e-22	41.6424634135289	down	ML311
GSK461364	-0.350379	7.29623387723065	-6.13744	2.49023554395503e-09	4.35330065461768e-09	10.2828308064423	down	GSK461364
GW-843682X	-0.350857	12.8222877242115	-10.3495	7.86091605741979e-22	3.63760037166877e-21	38.6379273127746	down	GW-843682X
CAY10618	-0.401308	10.108695526369	-6.342	7.76718899342674e-10	1.43207547066305e-09	11.4200445977879	down	CAY10618
daporinad	-0.453096	10.4698084522694	-5.83431	1.32803416031904e-08	2.23071930131881e-08	8.65209027048204	down	daporinad
